# Supplementary material
Source: PubMed Central journal article supplement (PMC5965253)
Supplement: ADHM-6-na-s001.pdf [file ADHM-6-na-s001.pdf]

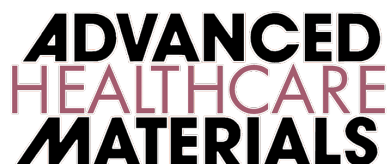

## Supporting Information

for *Adv. Healthcare Mater.*, DOI: 10.1002/adhm.201700383

Peptide-Functionalized Fluorescent Particles for In Situ  
Detection of Nitric Oxide via Peroxynitrite-Mediated Nitration

*Jason Y. H. Chang, Lesley W. Chow, W. Michael Dismuke, C.  
Ross Ethier, Molly M. Stevens, W. Daniel Stamer,\* and Darryl  
R. Overby\**

## Supporting Information

*Jason Y.H. Chang, Lesley W. Chow, W. Michael Dismuke, C. Ross Ethier, Molly M. Stevens, W. Daniel Stamer,\* and Darryl R. Overby\**

Dr. J. Y. H. Chang,<sup>[+]</sup> Prof. C. R. Ethier, Dr. D. R. Overby  
Department of Bioengineering  
Imperial College London  
London SW7 2AZ, UK  
E-mail: [d.overby@imperial.ac.uk](mailto:d.overby@imperial.ac.uk)

Dr. L.W. Chow,<sup>[++]</sup> Prof. M. M. Stevens  
Department of Materials, Department of Bioengineering, and Institute of Biomedical  
Engineering  
Imperial College London  
London SW7 2AZ, UK

Prof. C. R. Ethier  
Wallace H. Coulter Department of Biomedical Engineering  
Georgia Institute of Technology and Emory University  
Atlanta, GA 30332, USA

Dr. J.Y.H. Chang, Dr. W. M. Dismuke, Prof. W. D. Stamer  
Department of Ophthalmology  
Duke University School of Medicine  
Durham, NC 27710, USA  
E-mail: [dan.stamer@duke.edu](mailto:dan.stamer@duke.edu)

<sup>[+]</sup> Present address: Koch Institute for Integrative Cancer Research, Massachusetts Institute of  
Technology, 77 Massachusetts Ave, Cambridge, MA 02139, USA

<sup>[++]</sup> Present address: Department of Materials Science and Engineering and Bioengineering  
Program, Lehigh University, Bethlehem, PA 18015, USA

**Table S1:** Comparison of NO detection platforms.

|                                                      | <i>Principle of Detection</i>                                                                                                                                                            | <i>Detection Limit</i>                                                                                                                                                              | <i>Spatial Localization</i>                                                                                            | <i>Comments</i>                                                                                                                                                             |
|------------------------------------------------------|------------------------------------------------------------------------------------------------------------------------------------------------------------------------------------------|-------------------------------------------------------------------------------------------------------------------------------------------------------------------------------------|------------------------------------------------------------------------------------------------------------------------|-----------------------------------------------------------------------------------------------------------------------------------------------------------------------------|
| <b>Griess Assay</b>                                  | NO <sub>2</sub> <sup>-</sup> /NO <sub>3</sub> <sup>-</sup> - sensitive dye that detects the portion of NO that is oxidized to NO <sub>2</sub> <sup>-</sup> /NO <sub>3</sub> <sup>-</sup> | <b>0.5-1 μM</b> , cumulative measurement, as NO <sub>2</sub> <sup>-</sup> /NO <sub>3</sub> <sup>-</sup> accumulates over time                                                       | Localization not possible because measures NO <sub>2</sub> <sup>-</sup> /NO <sub>3</sub> <sup>-</sup> in bulk solution | •Gold standard for measuring NO in biological systems                                                                                                                       |
| <b>Fluorescent Methods</b>                           | NO-sensitive fluorophore that can be used in solution or trapped within individual cells                                                                                                 | <b>3-5 nM</b> in cell-free systems, but in biological samples detection is degraded to μM levels <sup>[a-c]</sup> . Cumulative measurement, as fluorophores bind irreversibly to NO | Localization possible, but requires optical access                                                                     | •Sensors may photo-bleach<br>•Sensors cross-react with other oxygen/nitrogen species present in biological samples                                                          |
| <b>Electrochemical</b>                               | Electrochemical probe sensitive to several reactive oxygen/nitrogen species covered by NO-selective membrane                                                                             | <b>~ 10 nM</b> , instantaneous measurement proportional to NO concentration at probe tip                                                                                            | Localization possible, but requires probe tip to be implanted within tissue                                            | •Invasive probe may disrupt tissue architecture and function<br>•Delicate probe tip                                                                                         |
| <b>Peptide-functionalized Particles (our method)</b> | Fluorescent particles coated with nitration-sensitive peptides detected afterwards using 3-nitrotyrosine antibodies                                                                      | <b>~100 nM</b> , cumulative measurement, as 3-nitrotyrosine accumulates over time                                                                                                   | Localization possible, but confined to the bead surface                                                                | •Localisation requires histology<br>•Measures NO via ONOO-mediated peptide nitration<br>•Detection limit that is more sensitive than Griess or DAF-FM in biological samples |

[a] H. Kojima, N. Nakatsubo, K. Kikuchi, S. Kawahara, Y. Kirino, H. Nagoshi, Y. Hirata, T. Nagano, *Anal. Chem.* 1998, 70, 2446.

[b] Z. Lacza, E. M. Horváth, E. Pankotai, A. Csordás, M. Kollai, C. Szabó, D. W. Busija, *J. Pharmacol. Toxicol. Methods* 2005, 52, 335.

[c] P. Lorenz, S. Roychowdhury, M. Engelmann, G. Wolf, T. F. W. Horn, *Nitric Oxide - Biol. Chem.* 2003, 9, 64.

[d] S. Roychowdhury, A. Luthe, G. Keilhoff, G. Wolf, T. F. W. Horn, *Glia* 2002, 38, 103.

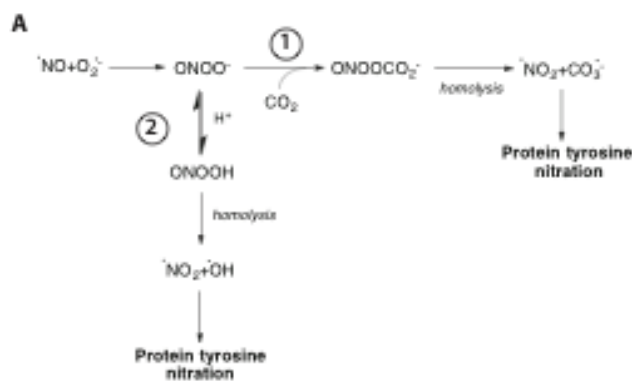

**B** Free radical mechanisms of tyrosine nitration

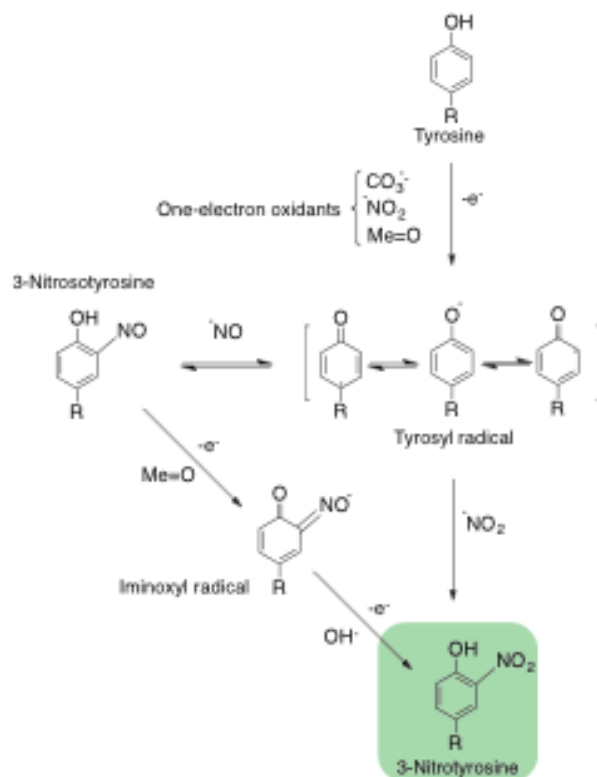

**Figure S1:** Biochemical pathway of peroxynitrite formation and tyrosine nitration. **(A)** Formation of peroxynitrite anion ( $\text{ONOO}^-$ ) through the diffusion-limited reaction of  $\text{NO}$  and  $\text{O}_2^{\bullet-}$  radicals. **(1)** A fundamental reaction of  $\text{ONOO}^-$  in biological systems is with carbon dioxide ( $\text{CO}_2$ ), which results in an intermediate adduct, nitroso-peroxocarbonate ( $\text{ONOOCO}_2^-$ ) that leads to the formation of carbonate ( $\text{CO}_3^-$ ) and nitrogen dioxide ( $\text{NO}_2$ ) radicals. **(2)** Alternatively,  $\text{ONOOH}$  can undergo homolytic fission to generate hydroxyl ( $\text{OH}^\bullet$ ) and  $\text{NO}_2$  radicals.<sup>[47]</sup> **(B)** These one-electron oxidants promote the formation of tyrosyl radicals ( $\text{Tyr}^\bullet$ ) which then combines with  $\text{NO}_2$  to form 3-nitrotyrosine. Schematic diagram is adapted from Radi et al.<sup>[41,44,50]</sup>

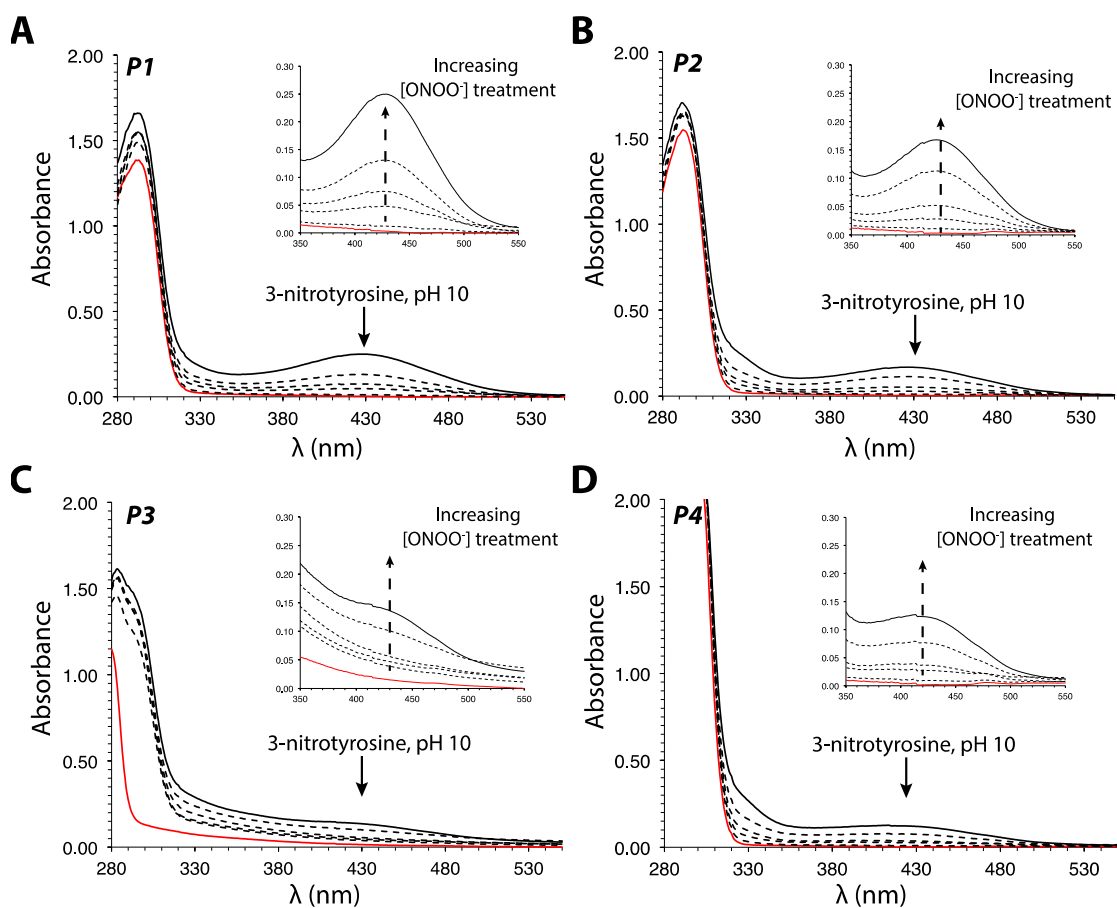

**Figure S2:** Nitration sensitivity of synthetic tyrosine-containing peptides measured by UV-VIS spectrophotometry. (A-D) Nitration sensitivity of peptides (P1-4) as a function of increasing concentration of peroxynitrite (10  $\mu$ M, 50  $\mu$ M, 100  $\mu$ M, 250  $\mu$ M and 500  $\mu$ M; black lines). 3-Nitrotyrosine absorbance is measured at 430nm under basic conditions (pH  $\sim$  10). (Inset) Magnification of absorbance values at 430nm for each nitrated peptide as a function of peroxynitrite treatment. Red lines = vehicle treated controls (0.3M NaOH).

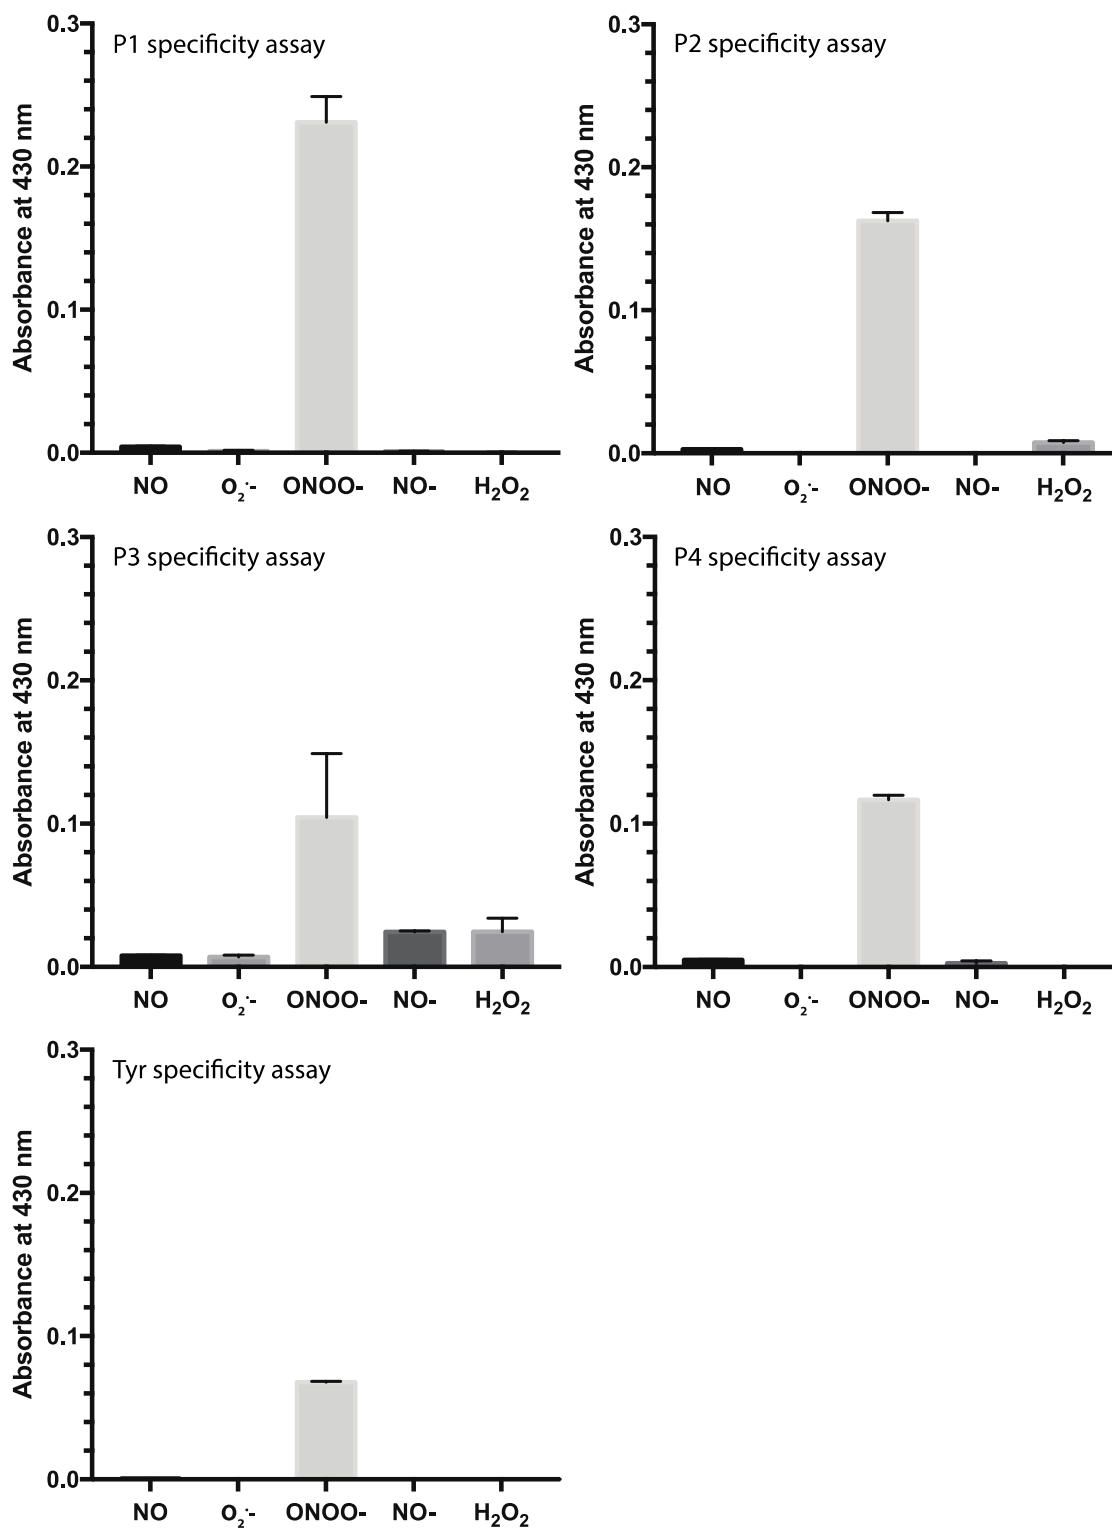

**Figure S3:** Peptide specificity assay treated with various reactive oxygen and nitrogen species (N=3). Nitric oxide: NO, superoxide:  $\bullet\text{O}_2^-$ , peroxynitrite: ONOO<sup>-</sup>, Angeli's salt: NO<sup>-</sup> and hydrogen peroxide: H<sub>2</sub>O<sub>2</sub>. Superoxide is generated by xanthine/xanthine oxidase system.<sup>[70]</sup>

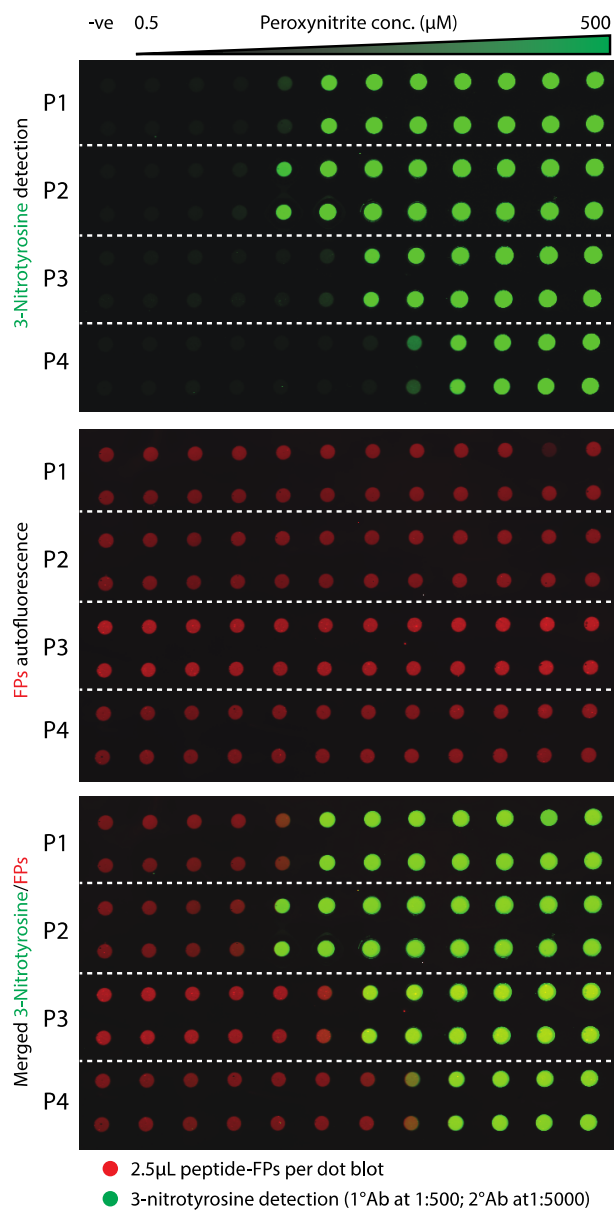

**Figure S4:** Representative peptide-conjugated fluorescent particle complex dot blot sensitivity immunoassay. **(Top)** 3-Nitrotyrosine detection for each of the synthetic peptide-conjugated fluorescent particle complexes with varying concentration of peroxyntirite treatment (green). **(Middle)** Fluorescent particles to quantify the loading concentration per sample (red). **(Bottom)** Overlay of 3-nitrotyrosine and fluorescent particles. -ve = Vehicle treated controls (0.3M NaOH).

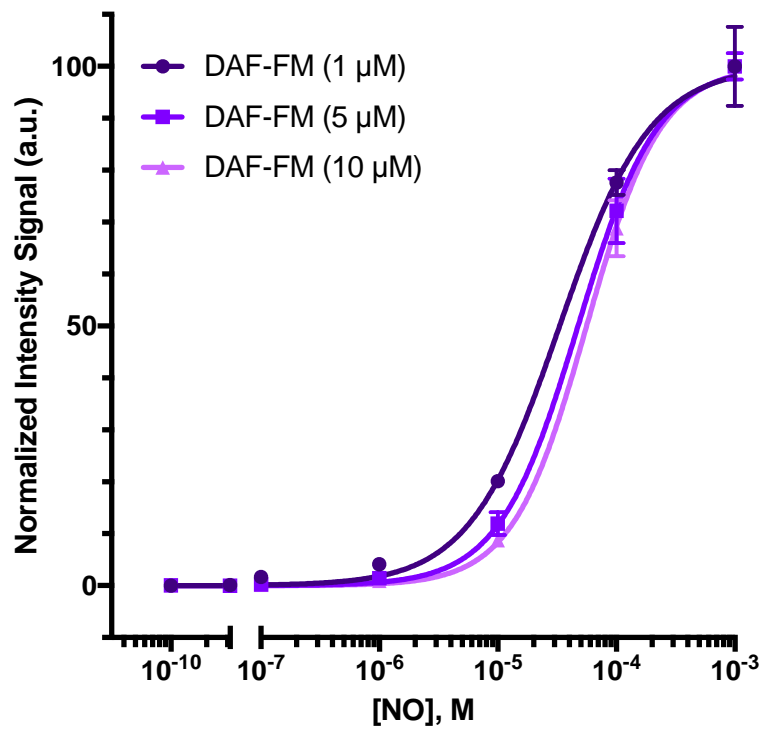

**Figure S5:** Detection of NO with varying concentrations of DAF-FM probe.



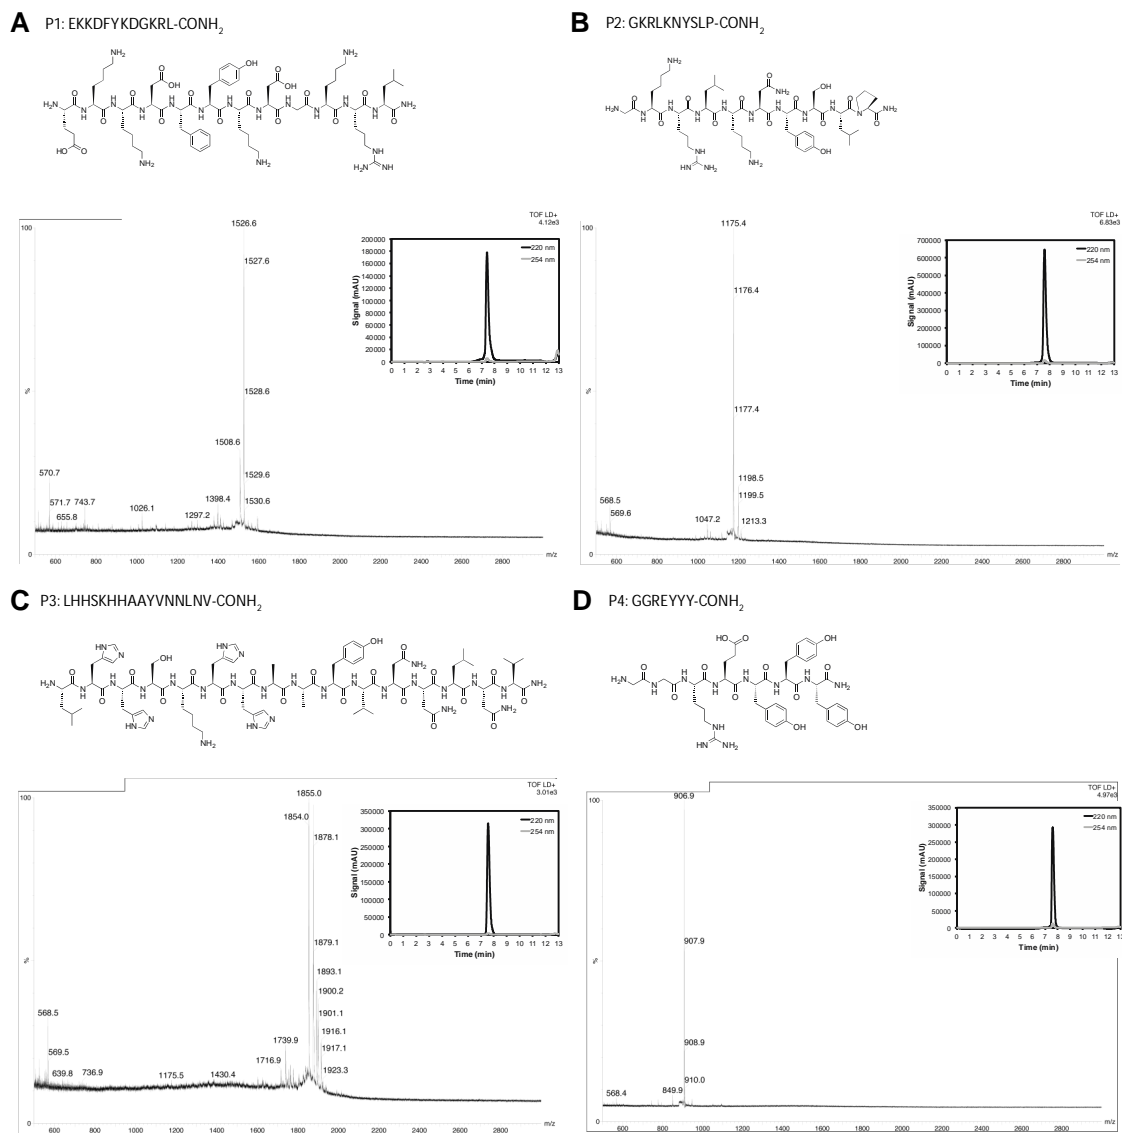

**Figure S6:** Chemical structures, MALDI and analytical HPLC trace of the purified peptide sensors. (A) P1: EKKDFYKDGKRL (MW 1526). (B) P2: GKRLKNYSLP (MW 1175). (C) P3: LHHSKHAAAYVNNLNV (MW 1854). (D) P4: GGREYYY (MW 906).
